# Supplementary material for: Grisel's Syndrome in Children: Two Case Reports and Systematic Review of the Literature
Source: Case Rep Pediatr. 2020 Nov 12;2020:8819758. doi: 10.1155/2020/8819758 (PMC7676959; doi:10.1155/2020/8819758)
Supplement: Supplementary Materials — Supplementary File 1: details of methods. Supplementary File 2: reference database. Supplementary File 3: CARE check list. [file 8819758.f1.zip]

Archive with 3 entries (3 files):
- Supplementary file 1 Details of methods.docx
- Supplementary file 2.docx
- Supplementary file 3 CARE-checklist-English-2013.docx
